# Supplementary material for: Liver-Specific Overexpression of Prostasin Attenuates High-Fat Diet-Induced Metabolic Dysregulation in Mice
Source: MDPI journal article supplement (doi:10.3390/ijms22158314), 2021-08-02
Supplement: s1 [file s1]

## SUPPLEMENTARY MATERIALS

### Liver-Specific Overexpression of Prostin Improves High-Fat Diet-Induced Metabolic Dysregulation in Mice

Tetsuo Sekine, Soichi Takizawa, Kohei Uchimura, Asako Miyazaki and Kyoichiro Tsuchiya

## SUPPLEMENTARY FIGURE

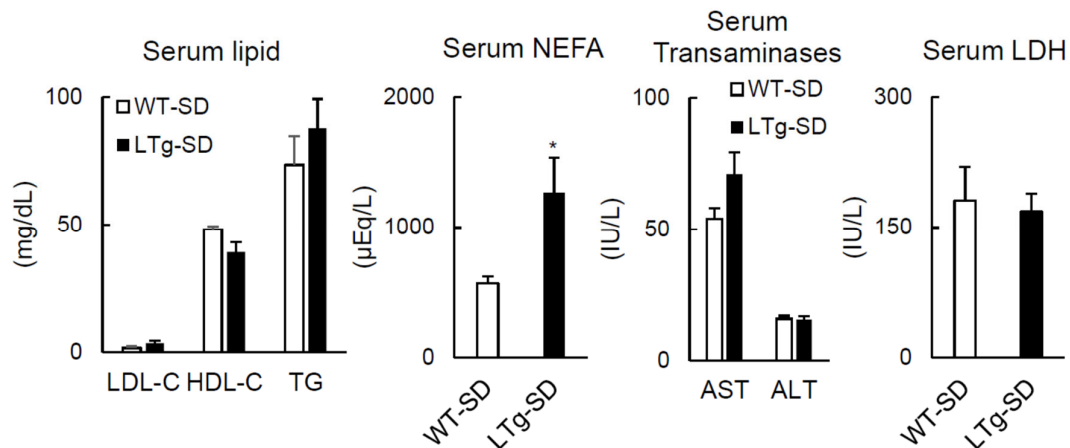

**Supplementary Figure S1.** Serum lipid profile, transaminases and lactate dehydrogenase levels in SD-fed WT/LTg mice. Serum low- and high-density lipoprotein cholesterol (LDL-C and HDL-C), triglycerides (TG), non-esterified fatty acid (NEFA), aspartate (AST) and alanine aminotransferase (ALT), and lactate dehydrogenase (LDH) levels in standard diet (SD)-fed WT/LTg mice under overnight fasting (14h) (n = 4 mice per group). Values are shown as the mean  $\pm$  SEM; \*  $p$ -value < 0.05 ( $t$  test).

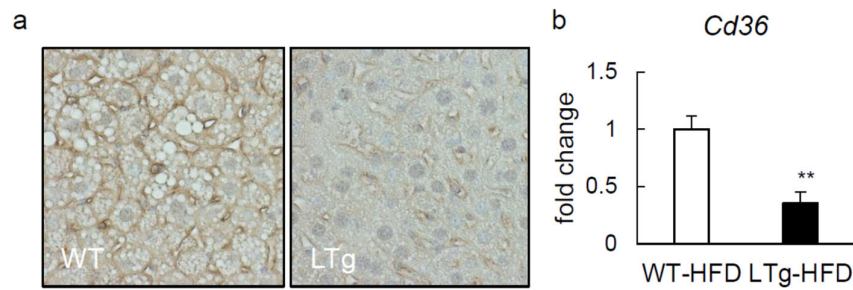

**Supplementary Figure S2.** CD36 expression in liver of HFD-fed WT/LTg mice. (a) Representative pictures of cluster of differentiation (CD) 36 immunostainings in liver of HFD-fed WT/LTg mice (x400). (b) *Cd36* gene expression in liver of HFD-fed WT/LTg mice under overnight fasting (14h) (n = 6–7 per group). Values are shown as the mean  $\pm$  SEM; \*\* *p*-value < 0.01 (*t* test).

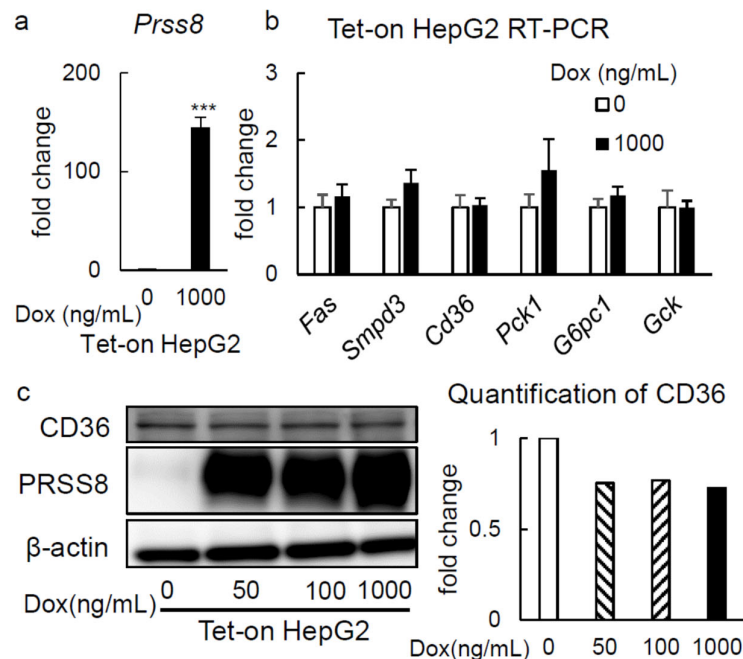

**Supplementary Figure S3.** Gene and CD36 expression in Tet-on HepG2 cells. (a) *Prss8* and (b) other various gene expression in liver of the Tet-on HepG2 cells under 72 hours exposure to each concentration of doxycycline (Dox) (n = 5–6 per group). Values are shown as the mean  $\pm$  SEM; \* *p*-value < 0.05, \*\* *p*-value < 0.01, and \*\*\* *p*-value

< 0.001 (*t* test). (c) Representative western blotting analysis and CD36 quantification using densitometry of three independent experiments in the Tet-on HepG2 cells under 72 hours exposure to each concentration of Dox.

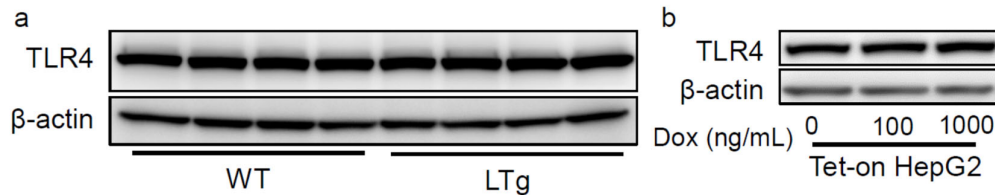

**Supplementary Figure S4.** TLR4 expression in liver of HFD-fed WT/LTg mice and in Tet-on HepG2 cells. (a) Western blotting of toll-like receptor (TLR) 4 in liver of HFD-fed WT/LTg mice under overnight fasting (14h) (*n* = 4 per group). (b) Western blotting of TLR4 in the Tet-on HepG2 cells under 72 hours exposure to each concentration of doxycycline (Dox).

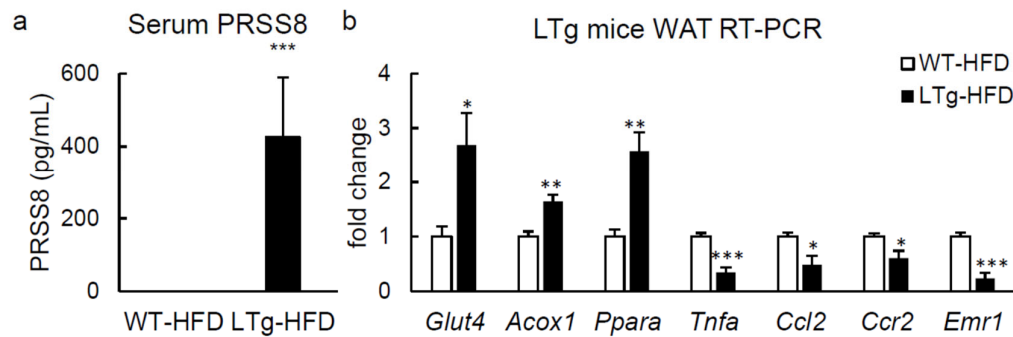

**Supplementary Figure S5.** Serum PRSS8 levels and gene expression in white adipose tissue of HFD-fed WT/LTg mice. (a) Serum hPRSS8 levels in HFD-fed WT/LTg mice under overnight fasting (14h) (*n* = 4 per group). (b) Gene expression levels in the epididymal white adipose tissue (WAT) of HFD-fed WT/LTg mice under overnight fasting (14h) (*n* = 5–7 per group). Values are shown as the mean  $\pm$  SEM; \* *p*-value < 0.05, \*\* *p*-value < 0.01, and \*\*\* *p*-value < 0.001 (*t* test).

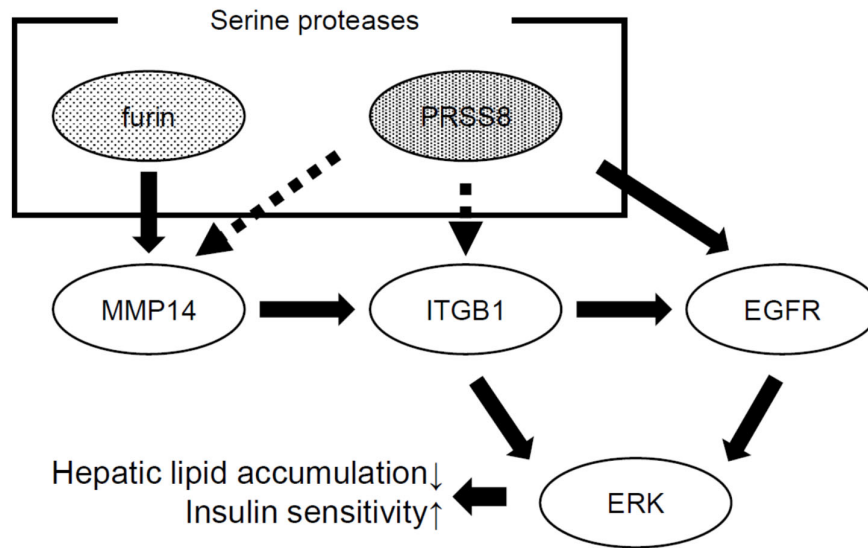

**Supplementary Figure S6.** The putative signaling pathways involved with a hypothetical schema. PRSS8; Prostasin, MMP14; Matrix metalloproteinase 14, ITGB1; Integrin subunit  $\beta$ 1, EGFR; Epidermal growth factor receptor, ERK; Extracellular signal-regulated kinase

Solid lines; Pathways shown in the previous studies

Dotted lines; Putative pathways shown in the present study

Furin, one of the serine proteases, cleavages and activates MMP14. MMP14 activates ITGB1. ITGB1 promotes ERK phosphorylation (directly or via EGFR phosphorylation). The present study showed that the PRSS8 could promote ERK phosphorylation via activating MMP14 and ITGB1 and promoting EGFR phosphorylation. ERK phosphorylation reduces hepatic lipid accumulation and improves insulin sensitivity.

**Supplementary Table S1. Characteristics of human study participants**

|                                              | Non-DM           | T2DM             | <i>p</i> -value |
|----------------------------------------------|------------------|------------------|-----------------|
| Sex (male, n [%])                            | 24 (60.0)        | 21 (53.8)        | 0.65            |
| Age, median [95% CI]<br>(years)              | 62 [48–72]       | 68 [45–78]       | 0.07            |
| BMI, median [95% CI]<br>(kg/m <sup>2</sup> ) | 22.1 [18.1–27.2] | 24.7 [18.7–35.4] | <0.01           |
| Blood pressure, median [95% CI]<br>(mmHg)    |                  |                  |                 |
| Systole                                      | 117 [102–128]    | 134 [108–163]    | <0.0001         |
| Diastole                                     | 74 [58–85]       | 70 [59–88]       | 0.64            |
| FPG, median [95% CI]<br>(mg/dL)              | 95 [82–110]      | 161 [109–283]    | <0.0001         |
| #IRI, median [95% CI]<br>(μU/mL)             | 2.86 [1.02–5.06] | 6.40 [1.47–19.8] | <0.0001         |
| Lipid profile, median [95% CI]<br>(mg/dL)    |                  |                  |                 |
| LDL-C                                        | 119 [79–160]     | 123 [73–210]     | 0.16            |
| HDL-C                                        | 60 [43–87]       | 44 [33–70]       | <0.0001         |
| TG                                           | 73 [41–232]      | 131 [59–321]     | <0.0001         |
| Smoking, n (%)                               | 15 (37.5)        | 19 (48.7)        | 0.37            |
| Medication                                   |                  |                  |                 |
| OHA, median [95% CI]<br>(number of agents)   | NA               | 1 [0–4]          | NA              |
| Insulin / GLP-1 RA, n (%)                    | NA               | 12 (30.8)        | NA              |

DM; diabetes mellitus, BMI; body mass index, FPG; fasting plasma glucose, IRI; immunoreactive insulin, LDL-C; low-density lipoprotein, HDL-C; high-density lipoprotein, TG; triglyceride, OHA; oral hypoglycemic agent, GLP-1RA; glucagon-like peptide-1 receptor agonist, NA; not applicable

Statistical analysis; Fisher's exact test (age and smoking), t test (all others)

#T2DM patients with insulin therapy were excluded.

# **Supplementary Table S2. List of primers**

|                |    |                         |
|----------------|----|-------------------------|
| <i>mRplp0</i>  | Fw | ACCGCCTGGTTCTCCTATAA    |
|                | Rv | AAGACGATGTCACTCCAACG    |
| <i>mGapdh</i>  | Fw | TCAGGAGAGAGTGTTTCCTCGT  |
|                | Rv | GCAACAATCTCCACTTTGCC    |
| <i>mCidea</i>  | Fw | CAGAAATGGACACCGGGTAG    |
|                | Rv | CTCGTACATCGTGGCTTTGA    |
| <i>mCidec</i>  | Fw | GGTATTGCCAGGAGGCTG      |
|                | Rv | CTGCCACATGCCTGGAC       |
| <i>mFgf21</i>  | Fw | AGCCAGGGGTCATTCAAATC    |
|                | Rv | CAGGATCAAAGTGAGGGGAT    |
| <i>mIl1b</i>   | Fw | GCCACCTTTTGACAGTGATG    |
|                | Rv | CCCAGGTCAAAGGTTTGGAA    |
| <i>mTgfb</i>   | Fw | CCTGAGTGGCTGTCTTTGA     |
|                | Rv | GGGCTGATCCCGTTGATTTC    |
| <i>mTnfa</i>   | Fw | ACCCTCACACTCAGATCATCTTC |
|                | Rv | TGGTGGTTTGCTACGACGT     |
| <i>mCol1a1</i> | Fw | CGCTGGTGCTGCTGAC        |
|                | Rv | TTCTCCTTTCTGCCCCTTTG    |

---

|                |    |                           |
|----------------|----|---------------------------|
| <i>mCol1a2</i> | Fw | TTGCAATCGGGATCAGTACGA     |
|                | Rv | CACGTGGTCCTCTGTCTCCAG     |
| <i>mMmp14</i>  | Fw | AGAGAACTTCGTGTTGCCTG      |
|                | Rv | TGACCCTGACTTGCTTCCATA     |
| <i>mTimp2</i>  | Fw | AAGGAGTATCTAATTGCAGGAAAGG |
|                | Rv | GCTCTTCTTCTGGGTGATGC      |
| <i>mCd36</i>   | Fw | GCCAAGCTATTGCGACATGA      |
|                | Rv | ACAGCGTAGATAGACCTGCAA     |
| <i>mGlut4</i>  | Fw | CCGGACCCTATAACCCTATTCA    |
|                | Rv | GGGTTCCTCCATCGTCAGAG      |
| <i>mAcox1</i>  | Fw | TCATGTGGTTTAAAAAACTCTGTGC |
|                | Rv | CGTGATCTCCAGATTCCAGG      |
| <i>mPpara</i>  | Fw | GAACTTAGAGGAGAGCCAAGTT    |
|                | Rv | GACCATGTTGGATGGATGTG      |
| <i>mCcl2</i>   | Fw | ATCCCAATGAGTAGGCTGGA      |
|                | Rv | GAGCTTGGTGACAAAACTACA     |
| <i>mCcr2</i>   | Fw | ACAAATCAAAGGAAATGGAAGAC   |
|                | Rv | TGCCGTGGATGAACTGAGG       |
| <i>mEmr1</i>   | Fw | CTTTGGCTATGGGCTTCCAGTC    |
|                | Rv | GCAAGGAGGACAGAGTTTATCGT   |
| <i>hRplp0</i>  | Fw | GCAAGAACACCATGATGCG       |
|                | Rv | AGCAGCTGGCACCTTATTG       |
| <i>hMmp14</i>  | Fw | CGTCCATCAACACTGCCTAC      |
|                | Rv | ACCCAATGCTTGTCTCCTTTG     |
| <i>hTimp2</i>  | Fw | ACGACATTTATGGCAACCCT      |

---

---

|                |    |                         |
|----------------|----|-------------------------|
|                | Rv | CAGGCCCTTTGAACATCTTTATC |
| <i>hPprss8</i> | Fw | CCAGCTAGACTCCTACTCCG    |
|                | Rv | GAGTTGGAGGAGTGCAATGT    |
| <i>hFas</i>    | Fw | ATGAGGCTGTGAAGCCATTC    |
|                | Rv | GGTCTATGAGGCCTATCTGGA   |
| <i>hSmpd3</i>  | Fw | GATAACTGCTCCTCTGACGAC   |
|                | Rv | GCACACATCCTCATCGTACA    |
| <i>hCd36</i>   | Fw | GGTCCTTATACGTACAGAGTTCG |
|                | Rv | GTTGTCAGCCTCTGTTCCAA    |
| <i>hPepck1</i> | Fw | ATCGTCACCCAAGAGCAAAG    |
|                | Rv | ACATGGTGCGACCTTTCAT     |
| <i>hG6pase</i> | Fw | CGTGATGGTCACATCTACTCTT  |
|                | Rv | TGACATTCAAGCACCGAAATC   |
| <i>hGck</i>    | Fw | GCGGAGAAGCCTTGGATATT    |
|                | Rv | GGATCTGCTCTACCTTCTCCT   |

---
